# Supplementary material
Source: PubMed Central journal article supplement (PMC2704382)
Supplement: NIHMS105134-supplement-01.pdf [file NIHMS105134-supplement-01.pdf]

## Supplemental Data

### Disrupted in Schizophrenia 1 Regulates

### Neuronal Progenitor Proliferation via

### Modulation of GSK3 $\beta$ / $\beta$ -Catenin Signaling

Yingwei Mao, Xuecai Ge, Christopher L. Frank, Jon M. Madison, Angela N. Koehler, Mary Kathryn Doud, Carlos Tassa, Erin M. Berry, Takahiro Soda, Karun K. Singh, Travis Biechele, Tracey L. Petryshen, Randall T. Moon, Stephen J. Haggarty, and Li-Huei Tsai

#### SUPPLEMENTAL EXPERIMENTAL PROCEDURES

**Mice.** Swiss Webster pregnant female mice were purchased from Taconic. Male C57/B6J mice were obtained from the Jackson Laboratory.

**Cell culture.** AHPs were kindly provided by Dr. Gage and cultured under conditions described previously (Palmer et al., 1997). Primary neural progenitors were isolated from E14 mouse embryos and cultured as described previously (Sanada and Tsai, 2005). N2a and 293T cells were cultured in DMEM medium containing 10 % FBS, L-glutamine, and penicillin/streptomycin. Wnt3a expressing L cells and untransfected L cells were obtained from ATCC. Wnt3a conditional medium was produced according to the ATCC protocol. To induce AHP differentiation, FGF2 was removed from the culture medium and 1  $\mu$ M retinoic acid/1% FBS was added to the medium for 4 days.

**Reagents.** Recombinant Wnt3a protein was obtained from Chemicon. FGF2 was obtained from PeproTech. Recombinant GST-GSK3 $\beta$  was obtained from Active Motif. Recombinant GST- $\beta$ -catenin and GST-axin were obtained from Millipore. The GSK3 $\beta$  inhibitor, SB-216763, and His-GSK3 $\beta$ , were obtained from Sigma-Aldrich. L803-mts was obtained from Calbiochem. GST-AKT1 was obtained from Cell Signaling. GST-CASK-1(CASK fragment from 316-415aa), GST-CASK-2 (CASK fragment from 777-974aa), and GST-p25 proteins were kindly provided by Dr. B.A. Samuels. Mouse DISC1 peptide-neg (40-77aa: GYMRSTAGSG IGFLSPA VGM PHPSSAG LTGQQSQHSQS) and Disctide1 (195-238aa, PADIASLPGFQDTFTSSFSFIQLSLGAA GERGEAEGCLPSREAE) were synthesized by Chi Scientific. CACNA1B peptide (2007-2018aa: QPAPNASPMKRSC) was synthesized in Tufts University. The GSK3 $\beta$  inhibitor CHIR-99021 was synthesized by the Broad Institute using published protocols. 15-mer peptides were synthesized using standard Fmoc solid-phase automated peptide synthesis from its C-terminus to N-terminus by GenScript. Correct synthesis of all peptides was confirmed by matching molecular or fragment peaks using electrospray ionization mass spectrometry and purity checked by high performance liquid chromatography.

**Antibodies.** The primary antibodies used in this study were the following: rabbit anti-DISC1 C-terminal antibody, mouse and rabbit anti-GFP antibodies (Invitrogen); affinity purified rabbit anti-DISC1 antibody (Novus) for immunohistochemistry; mouse anti-FLAG, mouse anti-GFAP antibody, and mouse anti-Actin antibody (Sigma-Aldrich); mouse anti-GSK3 $\beta$  antibody, mouse anti- $\beta$ -catenin antibody, mouse anti-pY216 GSK3 $\beta$  and total GSK3 $\beta$  antibodies, and mouse anti-nestin antibody (BD Biosciences); rabbit anti-pS33/S37/T41  $\beta$ -catenin antibody, rabbit anti-pT222/226 C/EBP $\alpha$  and C/EBP $\alpha$  antibodies, rabbit anti-pS9 GSK3 $\beta$  antibody, and mouse anti-cyclin D1 antibody (Cell Signaling); mouse anti-HA antibody, mouse anti-GST antibody, mouse anti-ubiquitin antibody, goat anti-Sox2 antibody, mouse anti-axin2 antibody, rabbit anti-Cux2 antibody, rabbit anti-Ki67 antibody, mouse anti-NeuroN antibody, and rabbit anti- $\beta$ -catenin antibody (Santa Cruz); mouse Tuj-1 antibody (BABCO); mouse anti-BrdU antibody (DakoCytomation); guinea pig anti-doublecortin antibody (Chemicon); chicken anti-GFP antibody (Aves Labs); rabbit anti-pS10 Histone H3 antibody (Upstate). Rabbit pS231/S234-Ngn2 antibody and Ngn2 antibody were described previously (Ma et al., 2008).

**Constructs.** The sequences for shRNAs targeting DISC1 are as follows: control shRNA: 5'-CGGCTGAAACAAGAGTTGG-3'; DISC1 shRNA-1: 5'-GGCAAACACTGTGA AGT GC-3' (Kamiya et al., 2005); DISC1 shRNA-2: 5'-GCAGGAGGTCAGCAAG GCCTTG-3'. DISC1 shRNA-1 recognizes both rat and mouse DISC1. DISC1 shRNA-2 targets human, rat, and mouse DISC1. shRNA oligoribonucleotides were cloned into the pLentiLox 3.7 vector (Rubinson et al., 2003).  $\beta$ -catenin shRNAs were obtained from the Broad Institute RNA interference platform and the sequences are as follows:  $\beta$ -catenin shRNA-1: 5'-CTGATATTGACGGGCAGTAT-3',  $\beta$ -catenin shRNA-2: 5'-CCCAA GCCTTAGTAAACATAA-3'. The full length mouse DISC1 cDNA was generously provided by Dr. Cris Bragg. Four different fragments (1-220aa, 221-355aa, 356-595aa, and 596-852aa) from mouse DISC1 cDNA were amplified by PCR and subcloned into pGEX-4T2 to generate GST fusion constructs. The full length human DISC1 cDNA was generously provided by Dr. A. Sawa (John Hopkins University, MD). The full length human DISC1 was amplified by PCR and subcloned into the pOZ-N retroviral vector or pEGFP-C1 to generate a HA-FLAG-tagged or GFP-tagged WT-DISC1 expressing vector. HA-FLAG-tagged WT-DISC1 was subcloned upstream of the IRES and GFP in the lentiviral vector, FUGW (Scott and Lois, 2005), provided by Dr. C. Lois (MIT, MA). Concentrated lentivirus was produced as previously described (Rubinson et al., 2003). Viral titers, as determined by GFP expression in 293T cells, were  $5 \times 10^8$ - $1 \times 10^9$  transducing units per ml. Super 8XTOPFLASH (which contains 8 copies of the TCF/LEF binding site), a gift from Dr. R. Moon (University of Washington, WA) and a Renilla-Luc-TK reporter (pRL-TK, Promega) were used for testing TCF transcriptional activity. FLAG- $\beta$ -catenin (WT and S33A) and HA-GSK3 $\beta$  were provided by Dr. X. He (Harvard Medical School, MA). pCAGIG-Venus was provided by Dr. Zhigang Xie (Boston University, MA).

**Luciferase assays.**  $5 \times 10^5$  transduced AHPs, embryonic progenitors, or 293T cells were seeded into 24-well plates and transfected with 0.8  $\mu$ g of Super8XTOPFLASH or Super8XFOPFLASH and 0.1  $\mu$ g of pRL-TK using Lipofectamine 2000 (Invitrogen). 24

hours after transfection, transfected cells were stimulated with Wnt3a-conditioned medium (Wnt3a CM) for 14 hours and TCF reporter activity was measured using the Dual-Luciferase Assay System (Promega). For the rescue experiment, 1.6  $\mu\text{g}$  of vector, WT- $\beta$ -catenin, or SA- $\beta$ -catenin was cotransfected with 0.4  $\mu\text{g}$  of Super8XTOPFLASH and 0.1  $\mu\text{g}$  of pRL-TK using Lipofectamine 2000, and transfected cells were treated with Wnt3a (200 ng/ml). For all luciferase assays, we normalized the level of different overexpressed proteins. For the *in utero* TCF reporter assay, expression vector, Super 8XTOPFLASH and pRL-TK constructs were electroporated into embryonic brains at a 5:1:0.3 ratio. For the knockdown experiments, we electroporated mice at E13 and measured TCF activity at E15. For overexpression experiments, we electroporated mice at E14 and measured TCF activity at E15. All firefly luciferase activities were normalized with Renilla luciferase activity.

**Immunoblot and immunoprecipitation.** Immunoblots and immunoprecipitations were performed as described previously (Mao and Lee, 2005).

**FACS cell cycle analysis.** N2a cells were transfected with control or DISC1 shRNAs. 48 hours after transfection, cells were fixed with 2% paraformaldehyde and permeabilized with 75% ethanol. FACS analysis was conducted as described previously (Koso et al., 2006).

***In vitro* binding and kinase assay.** GST pull-down assays were conducted as described previously (Mao et al., 2004). Briefly, 5  $\mu\text{g}$  of purified GST-DISC1 fragments were incubated with glutathione-Sepharose beads (GE) for one hour. Beads were then washed with 1XPBS, 1% Triton X-100, 5 mM EDTA, 1 mM DTT, and 0.1 mM PMSF four times. 5  $\mu\text{g}$  of recombinant His-GSK3 $\beta$  protein was then incubated with beads for one hour and nonspecific proteins were washed off 4 times with RIPA buffer and twice with lysis buffer (150 mM NaCl, 0.1% NP40, 50 mM Tris, pH7.5, 5 mM EDTA). Associated proteins were assessed by Western blot with an anti-GSK3 $\beta$  antibody. To determine whether DISC1 inhibits GSK3 $\beta$  through direct association, we have taken efforts to optimize the GSK3 $\beta$  kinase assay using  $\beta$ -catenin as a substrate. At molar ratios ( $\beta$ -catenin:GSK3 $\beta$ ) of 0.5 and 1, the phosphorylation of  $\beta$ -catenin reached saturation after 15 minutes. Based on this, we performed kinase assays at a ratio of 2 ( $\beta$ -catenin :GSK3 $\beta$ =0.14  $\mu\text{M}$  : 0.07  $\mu\text{M}$ ). For the length of the reaction (at a ratio of 2), phosphorylation of  $\beta$ -catenin reached saturation at 30 minutes (data not shown). Therefore, we performed kinase assays within the linear range with a ratio of 2 and a duration of 15 minutes. For the GSK3 $\beta$  *in vitro* kinase assay, 1  $\mu\text{M}$  of purified DISC1 protein was incubated with 5 ng/ $\mu\text{l}$  GST-GSK3 $\beta$  in kinase buffer (2 mM MOPS, pH7.4, 0.05 mM EDTA, 2.5 mM MgAcetate, 100  $\mu\text{M}$  ATP, 10  $\mu\text{Ci}$  of  $^{32}\text{P}$ -ATP, 10 mM MgCl<sub>2</sub>) and 18.75 ng/ $\mu\text{l}$  GST-axin or GST- $\beta$ -catenin for 15 minutes at 30 °C. Kinase activity was measured using the anti-pY216 GSK3 $\beta$  antibody (BD) or radiography. For AKT kinase assay, 5  $\mu\text{M}$  of purified DISC1 protein was incubated with 10 ng/ $\mu\text{l}$  GST-AKT1 (Cell Signaling) in kinase buffer (5 mM MOPS, pH 7.2, 2.5 mM  $\beta$ -glycerophosphate, 1 mM EGTA, 0.4 mM EDTA, 5 mM MgCl<sub>2</sub>, 0.05 mM DTT, 50  $\mu\text{M}$  ATP, 1  $\mu\text{Ci}$   $^{32}\text{P}$ -ATP) at

room temperature for 30 min. Autophosphorylation of AKT1 was detected by radiography.

***In utero* BrdU labeling.** Control or DISC1 shRNA constructs were injected into E13 embryonic brains with an enhanced GFP (EGFP)-expressing plasmid (final concentration, 2  $\mu\text{g}/\mu\text{l}$ ; pCAGIG-Venus) at a 2:1 ratio. In the rescue experiments, the concentration of human WT-DISC1 or SA- $\beta$ -catenin plasmid was 2 fold higher than the shRNA constructs. In the chemical rescue experiment, SB216763 (2mg/kg) was i.p. injected into the mother mice 24 hour after electroporation for two days (E14-E15). BrdU (100 mg/kg) was i.p. injected into mice 48 hours after electroporation. After 2 hours, brains were processed and sections (20- $\mu\text{m}$  thick) were co-stained with anti-GFP and anti-BrdU or anti-pH3 antibodies. In the rescue experiments, brains were harvested 24 hours after BrdU injection. Brain sections were then co-stained with anti-GFP and anti-BrdU antibodies. The distribution of GFP positive cells was determined by dividing the number of GFP positive cells in each layer by the total number of GFP-positive cells in the entire section.

**Surface plasmon resonance.** The GSK3 $\beta$  surface plasmon resonance assay was conducted on a Biacore S51 instrument using Biacore CM5 sensor chips. Ethanolamine, EDC, NHS, and P-20 surfactant were all obtained from GE Lifesciences. An anti-GST antibody (GST capture kit, GE LifeSciences) was directly immobilized through primary amines using standard EDC/NHS chemistry according to the manufacturer's instructions. Either GST alone or GST-GSK3 $\beta$  (BD Biosciences) was captured to generate the GSK3 $\beta$  sensor chip. GST-GSK3 $\beta$  was thawed immediately before use and kept at 4  $^{\circ}\text{C}$  during sample preparation. Activity of GSK3 $\beta$  was monitored using FRATtide and CHIR-99021 binding. Binding assays were performed at 25  $^{\circ}\text{C}$ . The characterization of Peptide-neg, DISCtide2, L-803-mts, and the 15 mer peptide from the N-type calcium channel was carried out in 10 mM Tris, 150 mM NaCl, 0.005% P-20 surfactant (TBS-P20). GST-GSK3 $\beta$  was diluted to 3.75 ng/ $\mu\text{l}$  in PBS with 0.005% P-20 surfactant (PBS-P20) and captured on the sensor surface on *Spot* 1. Between 472.1 and 520.5 response units (RU) of protein was immobilized in each assay. GST was similarly captured at a level of 443.2 RU on *Spot* 2 and used as a reference surface. Compounds were injected at a flow rate of 30  $\mu\text{l}/\text{min}$  into the flow cell for 120 s followed by 120 s of buffer without compound. For assays involving binding of 15mer Disc1 peptide to GST-GSK3 $\beta$ , peptides were stored in DMSO and diluted into TBS-P20 with 2% DMSO for binding assays. 15mer Disc1 peptide identities were verified by LCMS. GST-GSK3 $\beta$  was diluted to 3.75 ng/ $\mu\text{l}$  in PBS with 0.005% P-20 surfactant (PBS-P20) and 2034.7 RUs were captured on the sensor surface on *Spot* 1. GST was similarly captured at a level of 1489.1 RU on *Spot* 2 and used as a reference surface. Compounds were injected at a flow rate of 30  $\mu\text{l}/\text{min}$  into the flow cell for 120s followed by 120s of buffer without compound. Compound characterizations of L803-mts, DISCtide2, DISCtide2 reverse, mDISC1-pep89 were carried out in TBS-P20 with 2% DMSO. DISCtide2, DISCtide2 reverse, mDisc1-pep89 were >95% pure and verified by LC-MS. Sensorgram data was analyzed using the Scrubber 2 software (BioLogic Software Pty Ltd). Data was GST-reference subtracted and corrected for protein capture, DMSO concentration, and analyte molecular weight.

**Discl peptides used in this study**

| <u>peptide</u>    | <u>peptide sequence</u> | <u>mDiscl residues</u> |
|-------------------|-------------------------|------------------------|
| 38                | PLASPALNG <b>PADIAS</b> | 186 - 200              |
| 39                | <b>ALNGPADIASLPGFQ</b>  | 191 - 205              |
| 40                | <b>ADIASLPGFQDTFTS</b>  | 196 - 210              |
| 41                | <b>LPGFQDTFTSSFSFI</b>  | 201 - 215              |
| 43 (DISCtide2)    | <b>SFSFIQLSLGAAGER</b>  | 211 - 225              |
| 44                | <b>QLSLGAAGERGEAEG</b>  | 216 - 230              |
| 45                | <b>AAGERGEAEGCLPSR</b>  | 221 - 235              |
| 46                | <b>GEAEGCLPSREAEP</b> L | 226 - 240              |
| 47                | <b>CLPSREAEP</b> LHQRPQ | 231 - 245              |
| 48                | EAEPLHQRPQEMAAE         | 236 - 250              |
| 89                | AQDSLPAITRRDWL          | 441 - 455              |
| DISCtide2 reverse | REGAAGLSLQIFSFS         | 225 - 211              |

Sequences in bold and blue are residues from mDISCtide1.

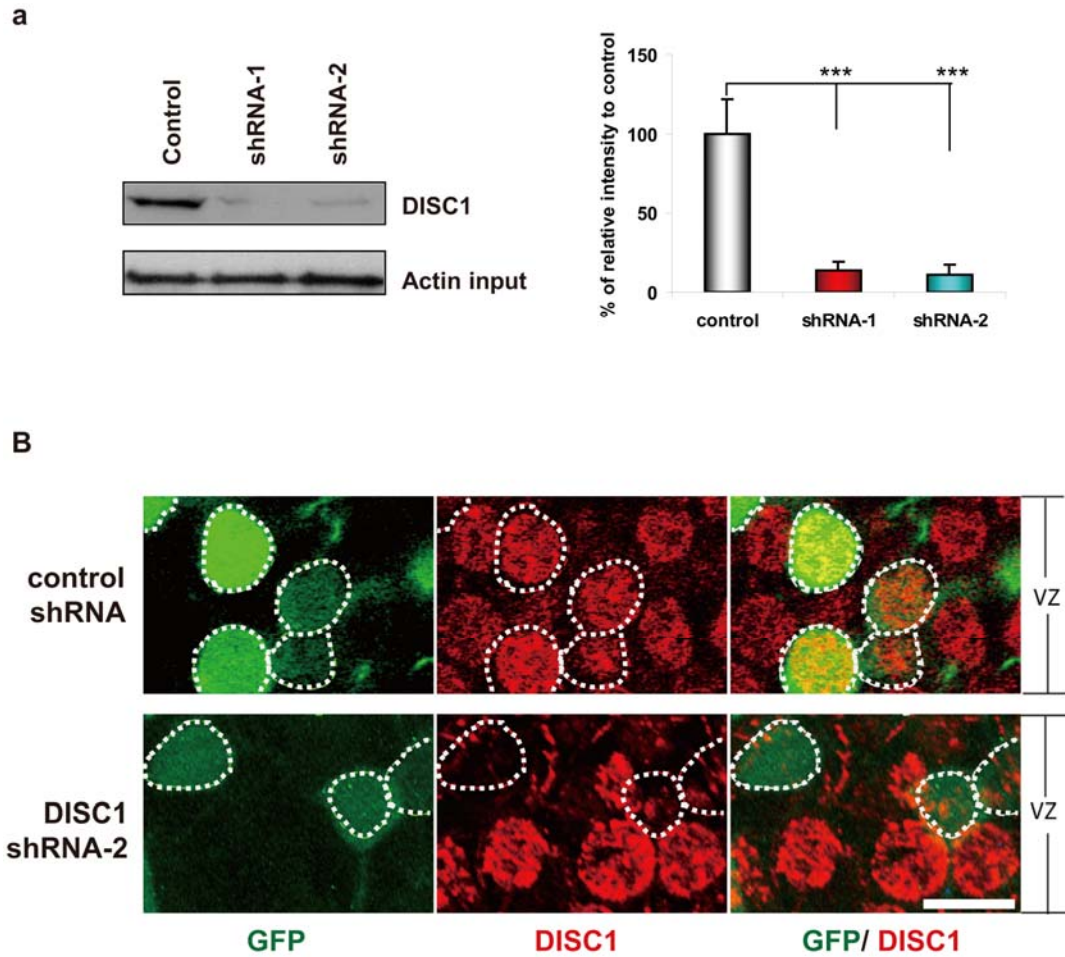

**Figure S1.** (A) Suppression of DISC1 expression by RNA interference. N2a cells were transduced with control or DISC1 shRNA lentivirus. Endogenous DISC1 protein was immunoprecipitated and blotted with an anti-DISC1 antibody (n=3, p<0.005, mean  $\pm$  SEM). (B) DISC1 expression is knocked down *in vivo*. Electroporated embryonic brain sections were stained with anti-DISC1. Circled cells are GFP-positive cells. Scale Bar=10  $\mu$ m.

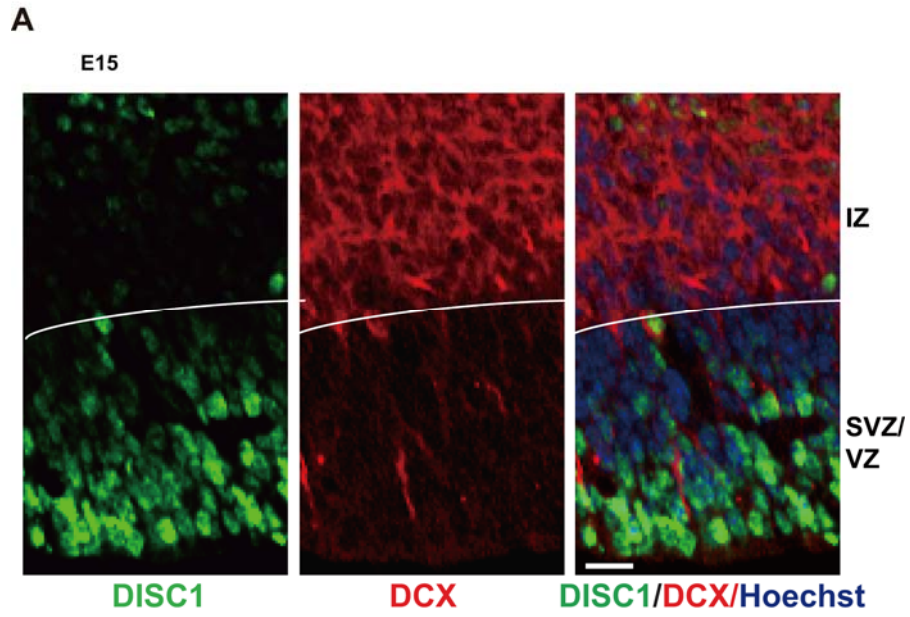

**Figure S2. (A)** E15 embryonic brains were sectioned and co-stained with anti-DISC1 and anti-DCX antibodies. Scale bar=20  $\mu$ m.

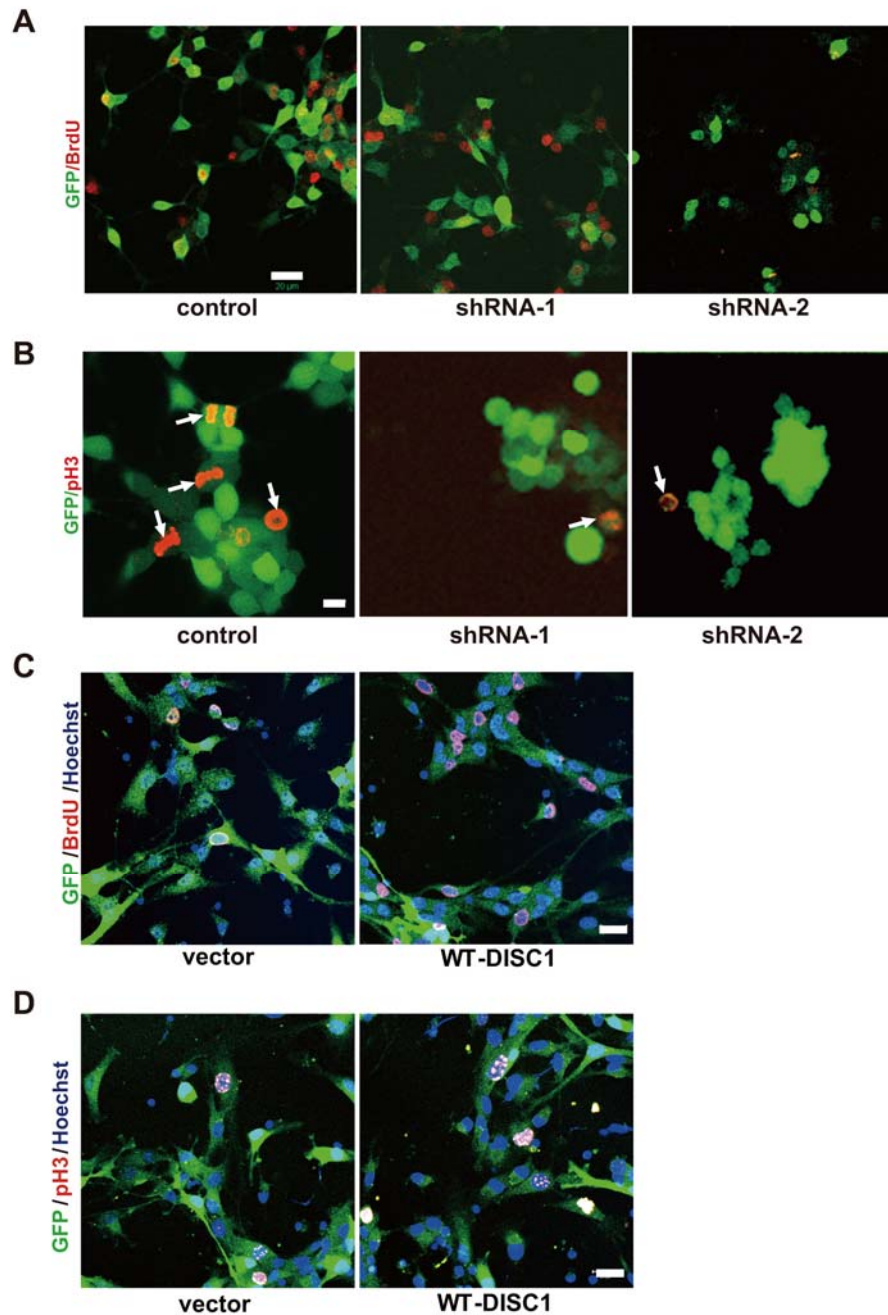

**Figure S3.** (A) BrdU incorporation is reduced in DISC1 knockdown cells. AHPs infected with either control or DISC1 shRNA lentivirus were pulse labeled with 10  $\mu$ M of BrdU and stained with BrdU antibody. Scale bar=20  $\mu$ m. (B) Mitotic index is decreased in DISC1-silenced AHPs. AHPs infected with either control or DISC1 shRNA lentivirus were stained with anti-phospho-Histone H3 (pH3) antibody. Scale bar=10  $\mu$ m. (C) BrdU incorporation is increased in DISC1 overexpressing AHPs. AHPs infected with either control or WT-DISC1 lentivirus were labeled with 10  $\mu$ M of BrdU for an hour and stained with anti-BrdU antibody. Scale bar=20  $\mu$ m. (D) Mitotic index is increased in DISC1 overexpressing AHPs. AHPs infected with either control or WT-DISC1 lentivirus were stained with the pH3 antibody. Scale bar=20  $\mu$ m.



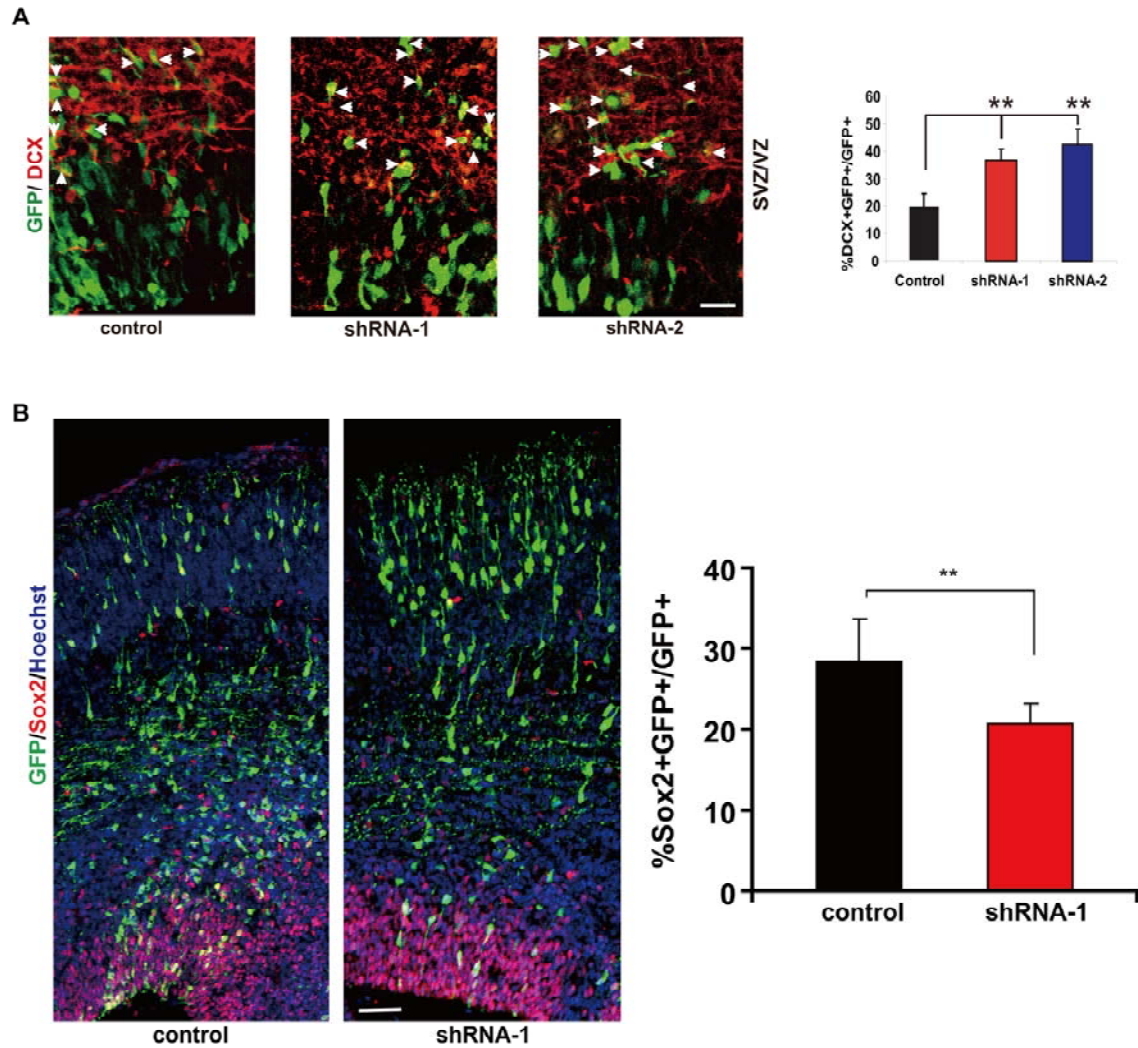

**Figure S4.** (A) Neuronal differentiation of DISC1 knockdown cells *in utero*. Control or DISC1 shRNA constructs were electroporated into E13 embryonic brains and mice were sacrificed at E16. Brain sections were stained with anti-GFP antibody and anti-DCX antibody. Shown is the percentage of GFP and DCX double positive cells in the SVZ ( $n=3$ ,  $p<0.01$ , mean  $\pm$  SEM). Scale bar=10  $\mu$ m. (B) Reduced neural progenitors of DISC1 knockdown *in utero*. Control or DISC1 shRNA constructs were electroporated into E13 embryonic brains and mice were sacrificed at E16. Brain sections were stained with anti-GFP antibody and anti-Sox2 antibody. Shown is the percentage of GFP and Sox2 double positive cells in the brain ( $n=3$ ,  $p<0.01$ , mean  $\pm$  SEM). Scale bar=20  $\mu$ m.

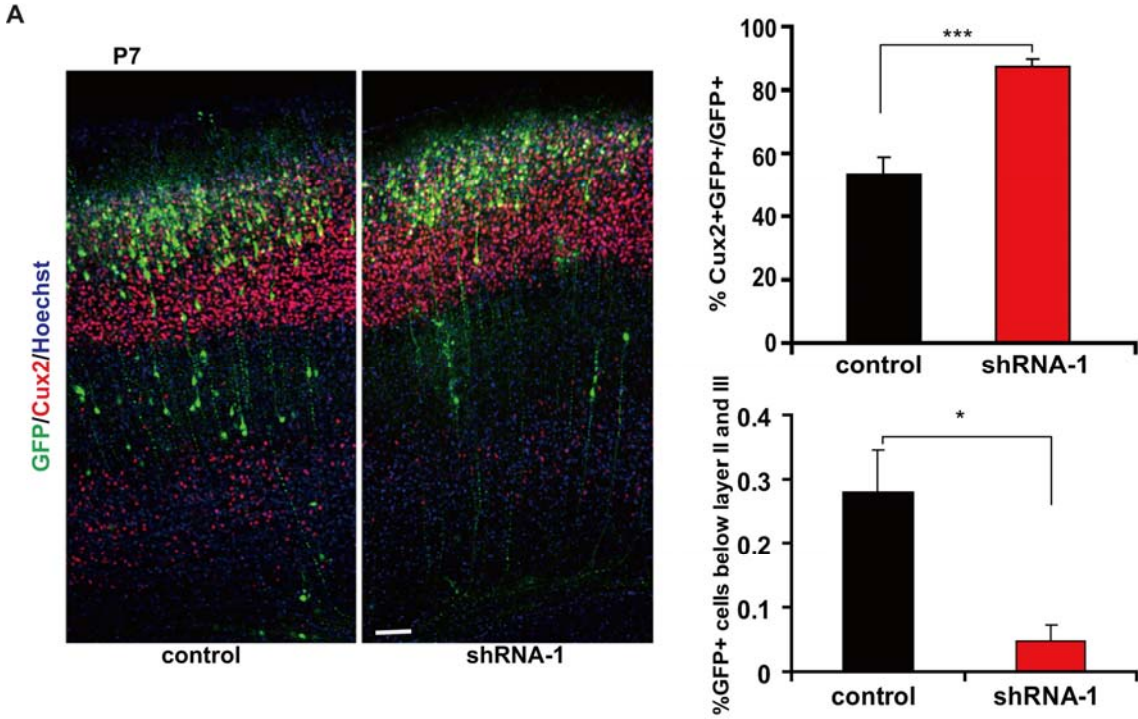

**Figure S5.** Increased Cux2 neuronal differentiation of DISC1 knockdown *in utero*. Control or DISC1 shRNA constructs were electroporated into E15 embryonic brains and mice were sacrificed at P7. Brain sections were stained with anti-GFP antibody and anti-Cux2 antibody. Shown are the percentage of GFP and Cux2 double positive cells in the brain and the percentage of GFP positive cells below layer II and III (n=3, \*,  $p < 0.05$ ; \*\*\*,  $p < 0.005$ , mean  $\pm$  SEM). Scale bar=20  $\mu$ m.

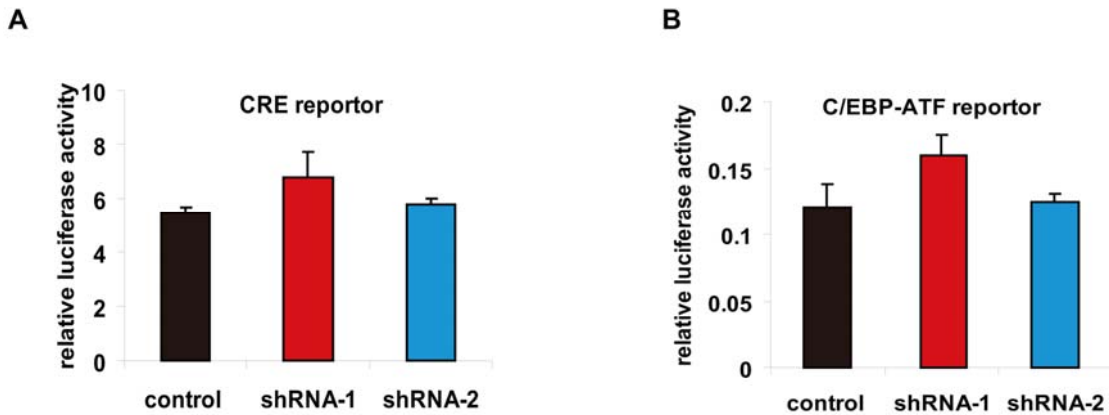

**Figure S6. (A and B)** DISC1 shRNAs did not affect the CRE (A) or C/EBP-ATF reporters (B). Bar graph shows the relative luciferase activity (n=3, mean  $\pm$  SEM).

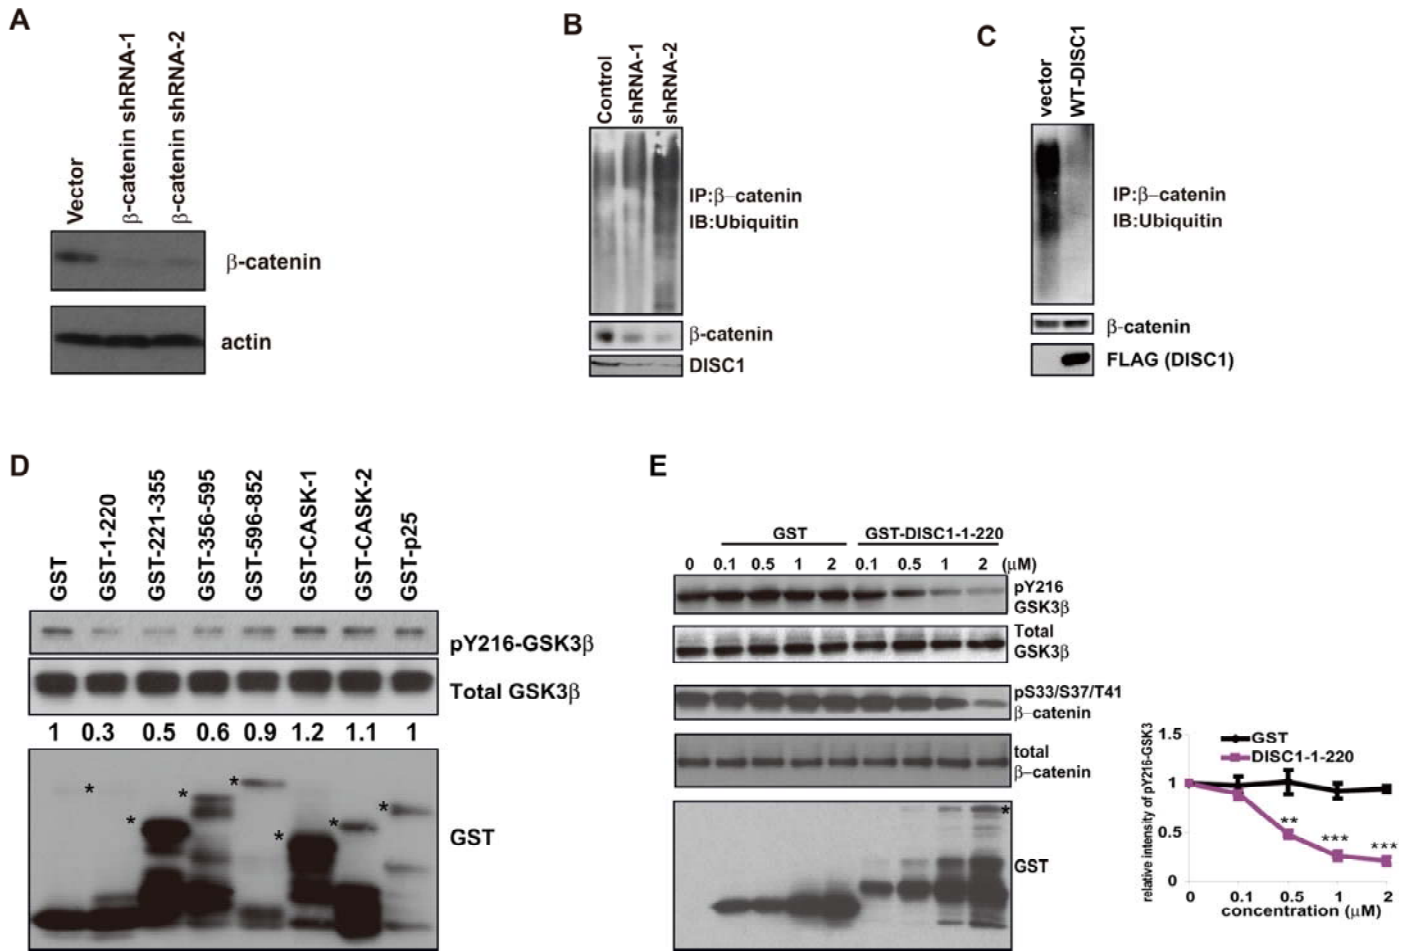

**Figure S7.** (A) N2a cells were transfected with control, β-catenin shRNA-1 or -2 for 48 hours. Cell lysates were probed with anti-β-catenin and actin antibodies. (B) Increased ubiquitination of β-catenin in AHPs expressing DISC1 shRNAs. (C) Overexpression of DISC1 suppresses β-catenin ubiquitination. (D) Phosphorylation of Y216 on GSK3β is reduced by all DISC1 fragments at 2 μM *in vitro*. Stars indicate the different intact GST fusion proteins. Numbers in the panel indicate the relative intensity of the band compared to GST (n=3). (E) Reduction of Y216 phosphorylation on GSK3β by DISC1 fragment 1-220 is dose-dependent. Stars indicate the different intact GST fusion proteins. The dose-response curve is shown (n=3, \*\*, p<0.01;\*\*\*, p<0.005, mean ± SEM).

### mouse DISC1

1 mqqggprgap ihspshgads ghglppavap qrrrltrpg ymrstagsgi gflspavgmp  
61 hpssagltgq qsqhsqskag qcglpdpshc qaslvkpfll ksslvpavas eghlhpaqrs  
121 mrkrpvhfav hskndsrqse rltgsfkpgd sgfwqellss dsfkslapsl dapwnkgsrg  
181 lktvkplasp alngpadias lpgfqdtfts sfsfiqlslg aagergeaeg clpsreaepl  
241 hqrpqemaee asssdrphgd prhlwtfslh aapgladlaq vtrsssrqse cgtvsssssd  
301 tgfssqdass aggrgdqggg wadahnwhtl lrewepmlqd yllsnrrqle vtsliiklqk  
361 cqekvvedgd ydtaetrqr leeleqekgr lswalpsqqp alrsfigyla aqiqvalhga  
421 tqragsddpe aplegqlrtt aqdsipasiit rrdwiirekq rlqkeiealq armsaleake  
481 krlsqeleeq evllrwpgcd lmalvaqmsp gqqlqevskal getltsanqa pfqveppetl  
541 rslrertksl nlavreltaq vcsgeklcss lrrrlslddt rlpalleakm laisgscfst  
601 akelteeiwa lssereglem flgrllalss rnsrrlgivk edhlrcrqdl alqdaahkr  
661 mkantvkcmee vlegqlsscr cpllgrvwka dletcqlmq slqlqeaqss phaedeeqvh  
721 stgeaaqtaa lavprtphe eeksplqlvq ewdthsalsp hcaagpwked shivsaevge  
781 kceaigvkll hledqllgam yshdealfqs lqgelqtvke tlqamilqlq ptkeageasa  
841 syptagaqet ea

### Peptide-neg

Mouse: 40GYMRSTAGSG IGFLSPAVGMPHPSSAGLT GQQSQHSQS 77  
Human: 44GYMRSSTGPG IGFLSPAVGT LFRFPGGVS GEESHSES 81

### DISCtide-1

Mouse: 195 PA DI ASLPGFQDTFT SSFSFIQ LSLGAAGERGEAEGCLPSREAE 238  
Human: 193 PE VPPTPPGSHSAFT SSFSFIR LSLGSAGERGEAEGCPPSREAE 236

**Figure S8.** DISC1 peptides are conserved from mouse to human. Peptide-neg (red) spans amino acids 40 to 77 and Disctide1 (blue) spans amino acids 195 to 238 of mouse DISC1.

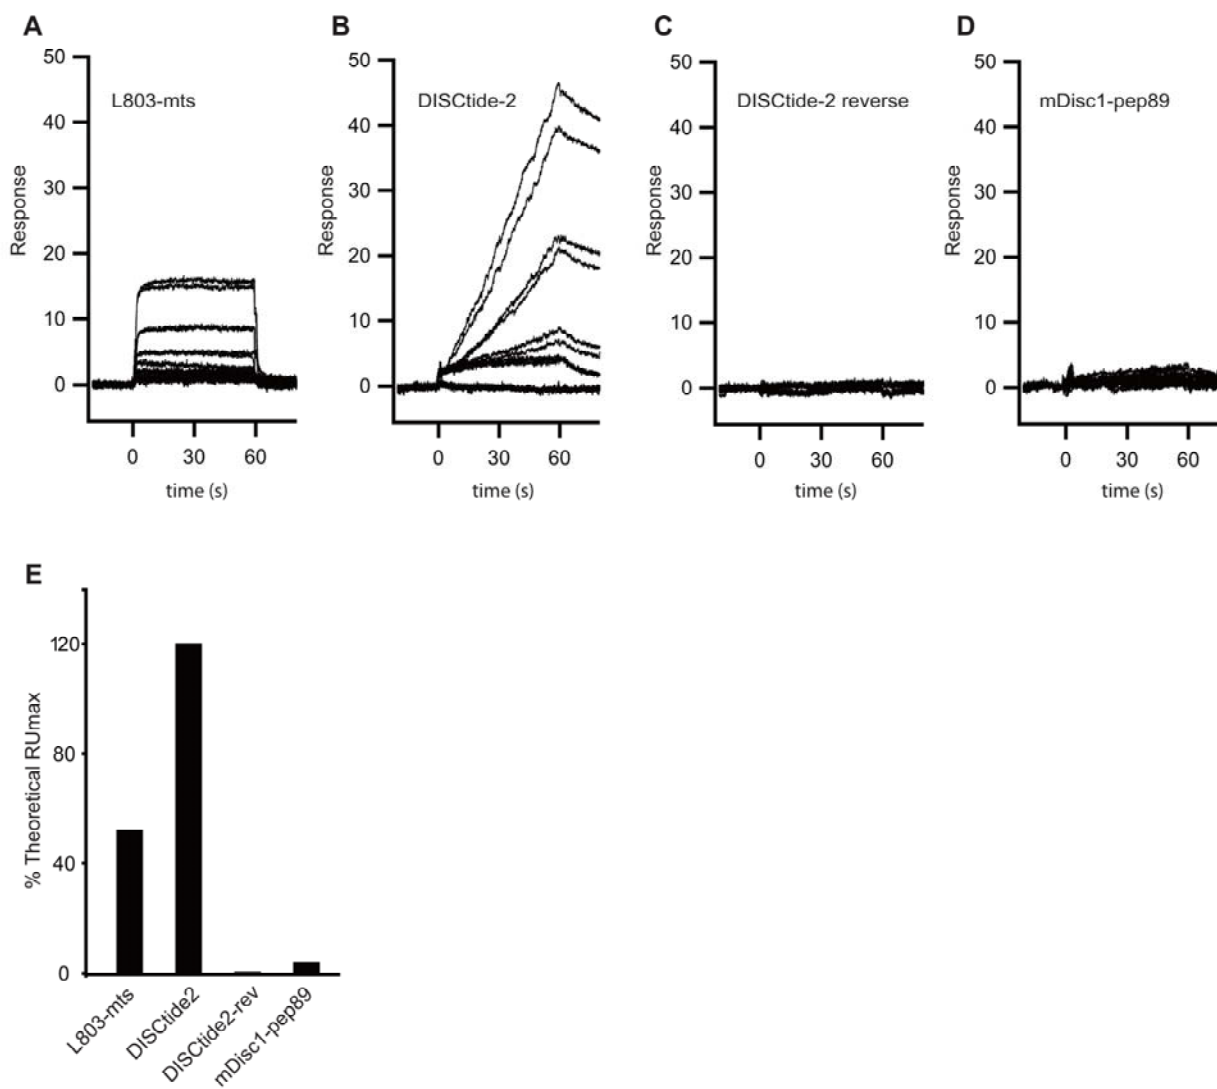

**Figure S9.** Surface plasmon resonance (SPR) characterization of the DISCtide2 GSK3 $\beta$  interaction. Binding of (A) L803-mts (B) DISCtide2 (C) DISCtide2 reverse and (D) a non-binding DISC1 15 mer peptide, mDISC1-pep89 from 0.195 – 50  $\mu$ M to GSK3 $\beta$ . (E) The percent theoretical maximal response for SPR binding assays at 50  $\mu$ M for panels A – D is summarized.

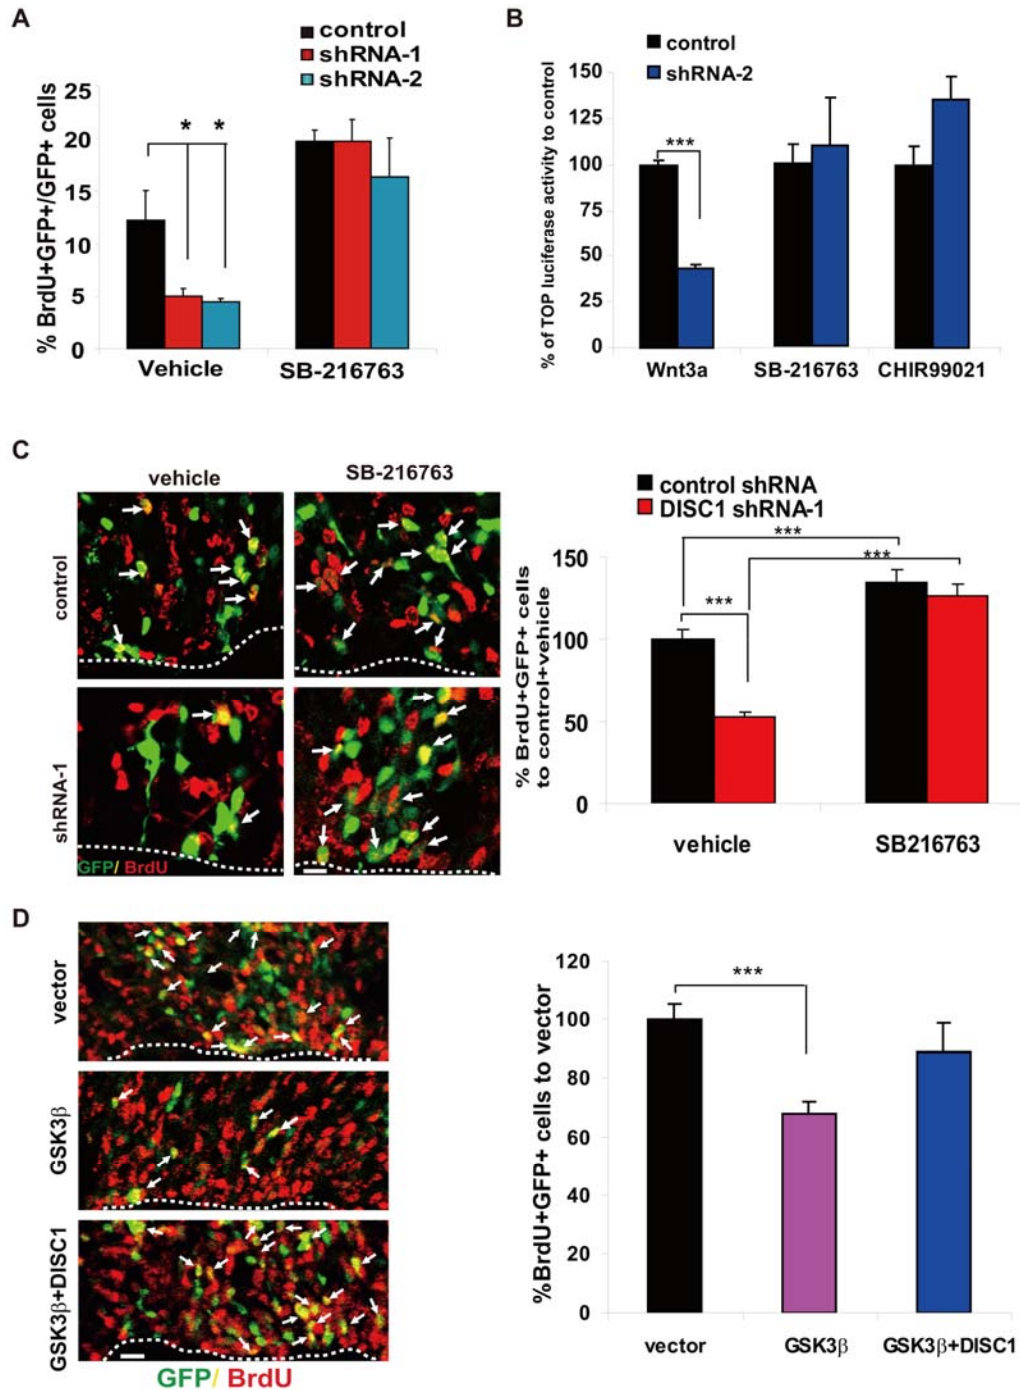

**Figure S10.** (A) The GSK3 $\beta$  inhibitor, SB-216763, can rescue DISC-1 knockdown-induced proliferation defects. Primary neural stem cells from E14 brains were infected with control or DISC1 shRNA lentivirus. 48 hours after transduction, cells were treated with vehicle or SB-216763 (5  $\mu$ M) for 16 hours and then pulsed with 10 $\mu$ M BrdU for 2 hours. Shown is percentage of GFP and BrdU double positive cells to total GFP positive cells ( $n=3$ ,  $p<0.05$ , mean  $\pm$  SEM). (B) The GSK3 $\beta$  inhibitor, SB-216763 or CHIR-99021, rescues the TCF activation defect caused by DISC1 knockdown in 293T cells. 0.5  $\mu$ g

control or DISC1 shRNA-2 was cotransfected with 0.1  $\mu\text{g}$  TCF reporter and 10 ng pRL-TK vector into 293T cells. 48 hours after transfection, Wnt3a conditional medium with vehicle, 5  $\mu\text{M}$  of SB-216763 or CHIR-99021 was added for another 16 hours. The bar graph shows the percentage of relative TCF reporter activity compared to the corresponding controls ( $n=3$ ,  $p<0.0001$ , mean  $\pm$  SEM). **(C)** The GSK3 $\beta$  inhibitor, SB-216763, rescues the proliferation defect caused by DISC1 knockdown *in utero*. Control or DISC1 shRNA constructs were electroporated into E13 embryonic brains and pregnant mice were i.p. injected with SB-216763 (2mg/kg) at E14 and E15. BrdU (100mg/kg) was given 2 hours before sacrifice at E16. Brain sections were stained with anti-GFP antibody and anti-BrdU antibody. Shown is the percentage of GFP and BrdU double positive cells in the SVZ ( $n=4$ ,  $p<0.001$ , mean  $\pm$  SEM) to control+vehicle. Scale bar=10  $\mu\text{m}$ . **(D)** DISC1 overexpression can suppress the effect of GSK3 $\beta$  on neural progenitor proliferation *in utero*. Shown is the percentage of GFP and BrdU double positive cells in the SVZ to control ( $n=3$ ,  $p<0.001$ , mean  $\pm$  SEM). Scale bar=10  $\mu\text{m}$ .

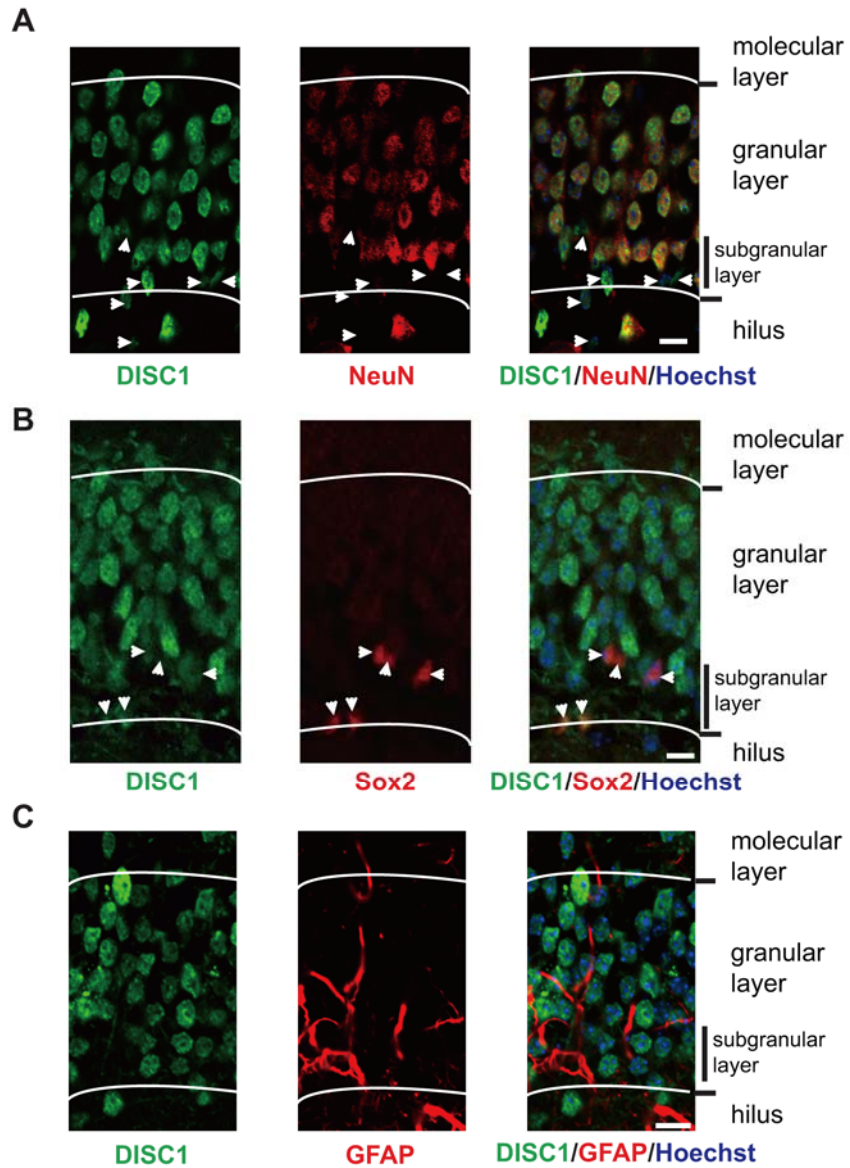

**Figure S11.** (A-C) DISC1 was co-stained with NeuN (A), Sox2 (B), or GFAP (C) in adult dentate gyrus. Arrows in (A) indicate cells that are DISC1 positive but NeuN negative. Arrows in (B) indicate cells that are DISC1 positive and Sox2 positive. Scale Bar= 10  $\mu$ m.



A

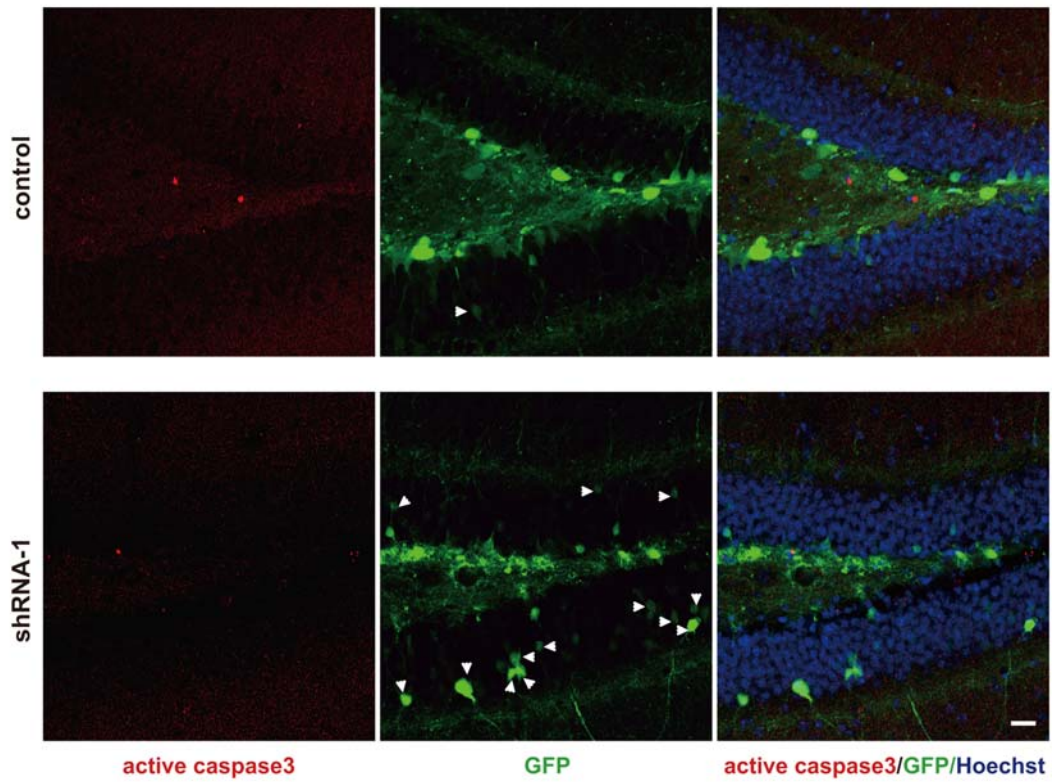

**Figure S12.** Apoptosis is not elevated by DISC1 silencing in the dentate gyrus. Control or DISC1 shRNA-1 lentivirus was injected into the adult dentate gyrus. Brain sections were stained with an anti-active caspase 3 antibody. Arrowheads indicate GFP positive cells distributed in the middle and outer granular layers. Scale Bar= 20  $\mu$ m.

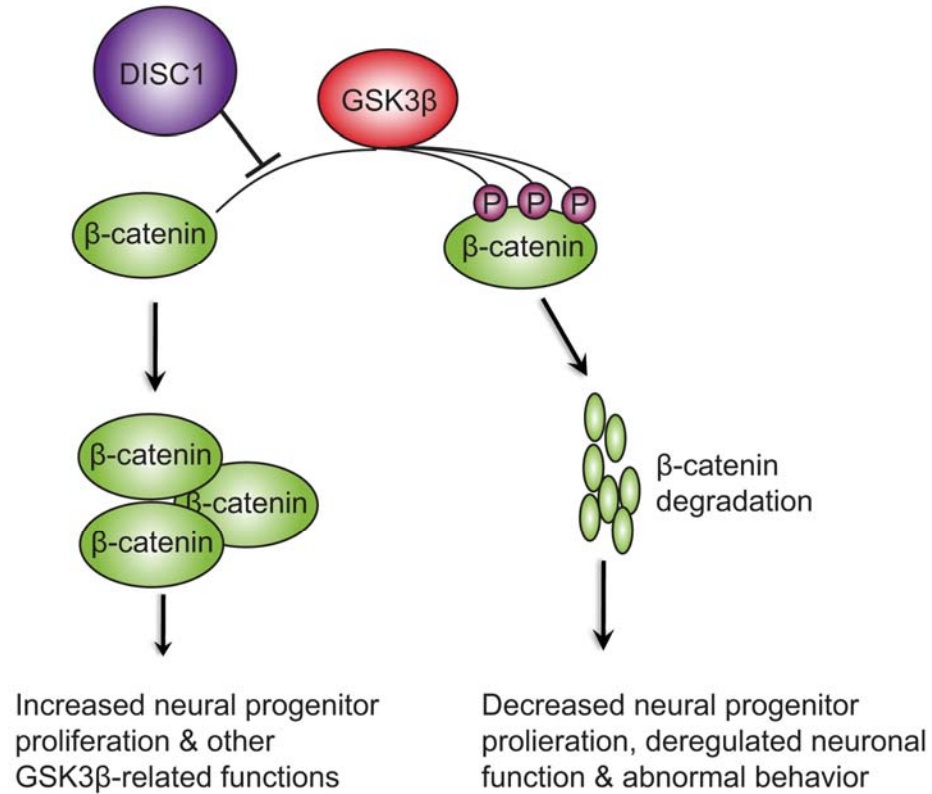

**Figure S13. Model**

Model depicting a role for DISC1 in regulation of neural progenitor proliferation. By regulating GSK3β activity, DISC1 modulates β-catenin stability and neural progenitor cell proliferation. DISC1 loss-of-function results in neural progenitor proliferation defects and abnormal behavior.

**SUPPLEMENTAL REFERENCES**

Kamiya, A., Kubo, K., Tomoda, T., Takaki, M., Youn, R., Ozeki, Y., Sawamura, N., Park, U., Kudo, C., Okawa, M., *et al.* (2005). A schizophrenia-associated mutation of DISC1 perturbs cerebral cortex development. *Nat Cell Biol* 7, 1167-1178.

Koso, H., Ouchi, Y., Tabata, Y., Aoki, Y., Satoh, S., Arai, K., and Watanabe, S. (2006). SSEA-1 marks regionally restricted immature subpopulations of embryonic retinal progenitor cells that are regulated by the Wnt signaling pathway. *Dev Biol* 292, 265-276.

Ma, Y. C., Song, M. R., Park, J. P., Henry Ho, H. Y., Hu, L., Kurtev, M. V., Zieg, J., Ma, Q., Pfaff, S. L., and Greenberg, M. E. (2008). Regulation of motor neuron specification by phosphorylation of neurogenin 2. *Neuron* 58, 65-77.

Mao, Y., and Lee, A. W. (2005). A novel role for Gab2 in bFGF-mediated cell survival during retinoic acid-induced neuronal differentiation. *J Cell Biol* 170, 305-316.

Mao, Y. W., Liu, J. P., Xiang, H., and Li, D. W. (2004). Human alphaA- and alphaB-crystallins bind to Bax and Bcl-X(S) to sequester their translocation during staurosporine-induced apoptosis. *Cell Death Differ* 11, 512-526.

Palmer, T. D., Takahashi, J., and Gage, F. H. (1997). The adult rat hippocampus contains primordial neural stem cells. *Mol Cell Neurosci* 8, 389-404.

Rubinson, D. A., Dillon, C. P., Kwiatkowski, A. V., Sievers, C., Yang, L., Kopinja, J., Rooney, D. L., Ihrig, M. M., McManus, M. T., Gertler, F. B., *et al.* (2003). A lentivirus-based system to functionally silence genes in primary mammalian cells, stem cells and transgenic mice by RNA interference. *Nat Genet* 33, 401-406.

Sanada, K., and Tsai, L. H. (2005). G protein betagamma subunits and AGS3 control spindle orientation and asymmetric cell fate of cerebral cortical progenitors. *Cell* 122, 119-131.

Scott, B. B., and Lois, C. (2005). Generation of tissue-specific transgenic birds with lentiviral vectors. *Proc Natl Acad Sci U S A* 102, 16443-16447.
